# Supplementary material for: Patterns of Novel Alleles and Genotype/Phenotype Correlations Resulting from the Analysis of 108 Previously Undetected Mutations in Patients Affected by Neurofibromatosis Type I
Source: PubMed Central journal article supplement (PMC5666753; doi:10.3390/ijms18102071), 2017-09-29
Supplement: ijms-18-02071-s001.pdf [file ijms-18-02071-s001.pdf]

**Table S1.** List of the previously undescribed *NF1* variants under study ( $N = 108$ ).

| ID | Exon | Nucleotide Change   | Affected Protein   | Variant Type | Predicted Effect | Allele Frequency |      | REVEL Score (0 to 1) | Pathogenicity Score | Familial (F)/De Novo (N) | Gender (M/F) | Domain  |
|----|------|---------------------|--------------------|--------------|------------------|------------------|------|----------------------|---------------------|--------------------------|--------------|---------|
|    |      |                     |                    |              |                  | ExAC             | IGSR |                      |                     |                          |              |         |
| 1  | 2    | Deletion exons 2–19 | p.?                | deletion     | truncation       | NP               | NP   |                      | 5                   | N                        | M            | Outside |
| 2  | 5    | c.538_541del        | p.Leu180Serfs*10   | deletion     | truncation       | NP               | NP   |                      | 5                   | F                        | M            | Outside |
| 3  | 5    | c.541_542del        | p.Gln181Valfs*19   | deletion     | truncation       | NP               | NP   |                      | 4                   | N                        | M            | Outside |
| 4  | 5    | c.586+2T>C          | p.?                | substitution | splicing         | NP               | NP   |                      | 4                   | F                        | F            | Outside |
| 5  | 6    | c.603del            | p.Phe201Leufs*4    | deletion     | truncation       | NP               | NP   |                      | 5                   | N                        | F            | Outside |
| 6  | 6    | c.610dup            | p.Leu204Profs*12   | duplication  | truncation       | NP               | NP   |                      | 5                   | N                        | M            | Outside |
| 7  | 6    | c.615G>A            | p.=                | substitution | synonymous       | NP               | NP   |                      | 3                   | N                        | F            | Outside |
| 8  | 8    | c.789del            | p.Ala264Glnfs*17   | deletion     | truncation       | NP               | NP   |                      | 5                   | N                        | M            | Outside |
| 9  | 8    | c.792del            | p.Ala265Glnfs*16   | deletion     | truncation       | NP               | NP   |                      | 5                   | N                        | M            | Outside |
| 10 | 8    | c.862del            | p.Val288Trpfs*7    | deletion     | truncation       | NP               | NP   |                      | 4                   | N                        | M            | Outside |
| 11 | 8    | c.886A>T            | p.Lys296*          | substitution | truncation       | NP               | NP   |                      | 4                   | N                        | M            | Outside |
| 12 | 8    | c.888+1G>C          | p.?                | substitution | splicing         | NP               | NP   |                      | 4                   | F                        | F            | Outside |
| 13 | 9    | c.1041_1045del      | p.Gln347Hisfs*4    | deletion     | truncation       | NP               | NP   |                      | 5                   | N                        | F            | Outside |
| 14 | 9    | c.1061A>G           | p.Lys354Arg        | substitution | missense         | NP               | NP   | 0.309                | 3                   | N                        | M            | Outside |
| 15 | 10   | c.1144del           | p.Ser382Leufs*5    | deletion     | truncation       | NP               | NP   |                      | 4                   | N                        | M            | Outside |
| 16 | 12   | c.1280_1292del      | p.Pro427Leufs*42   | deletion     | truncation       | NP               | NP   |                      | 5                   | N                        | F            | Outside |
| 17 | 12   | c.1324_1325del      | p.Met442Valfs*3    | deletion     | truncation       | NP               | NP   |                      | 5                   | N                        | M            | Outside |
| 18 | 12   | c.1374dup           | p.Ala459Serfs*11   | duplication  | truncation       | NP               | NP   |                      | 5                   | N                        | M            | Outside |
| 19 | 12   | c.1392del           | p.Ser465Valfs*8    | deletion     | truncation       | NP               | NP   |                      | 5                   | F                        | F            | Outside |
| 20 | 13   | c.1400del           | p.Thr467Asnfs*6    | deletion     | truncation       | NP               | NP   |                      | 5                   | N                        | M            | Outside |
| 21 | 13   | c.1460G>A           | p.Arg487Lys        | substitution | missense         | NP               | NP   | 0.107                | 3                   | N                        | M            | Outside |
| 22 | 13   | c.1462del           | p.Ser488Alafs*10   | deletion     | truncation       | NP               | NP   |                      | 5                   | N                        | M            | Outside |
| 23 | 13   | c.1469_1472del      | p.Lys490Ilefs*7    | deletion     | truncation       | NP               | NP   |                      | 5                   | N                        | F            | Outside |
| 24 | 13   | c.1477C>G           | p.Leu493Val        | substitution | missense         | NP               | NP   | 0.214                | 3                   | N                        | M            | Outside |
| 25 | 13   | c.1525dup           | p.Cys509Leufs*2    | duplication  | truncation       | NP               | NP   |                      | 5                   | N                        | F            | Outside |
| 26 | 14   | c.1561del           | p.Ser521Valfs*5    | deletion     | truncation       | NP               | NP   |                      | 5                   | N                        | M            | Outside |
| 27 | 14   | c.1585C>T           | p.Leu529Phe        | substitution | missense         | NP               | NP   | 0.434                | 3                   | N                        | F            | Outside |
| 28 | 14   | c.1613delT          | Met538Serfs*18     | deletion     | truncation       | NP               | NP   |                      | 5                   | F                        | M            | Outside |
| 29 | 14   | c.1641+2delT        | p.?                | deletion     | splicing         | NP               | NP   |                      | 4                   | N                        | F            | CSRD    |
| 30 | 15   | c.1683G>A           | p.Trp561*          | substitution | truncation       | NP               | NP   |                      | 5                   | N                        | F            | CSRD    |
| 31 | 15   | c.1714_1721+5del    | p.?                | deletion     | truncation       | NP               | NP   |                      | 4                   | N                        | M            | CSRD    |
| 32 | 17   | c.1866T>A           | p.Cys622*          | substitution | truncation       | NP               | NP   |                      | 5                   | N                        | M            | CSRD    |
| 33 | 17   | c.1883_1885delinsCC | p.Tyr628Serfs*3    | indel        | truncation       | NP               | NP   |                      | 5                   | N                        | F            | CSRD    |
| 34 | 17   | c.1889T>A           | p.Val630Glu        | substitution | missense         | NP               | NP   | 0.202                | 3                   | F                        | M            | CSRD    |
| 35 | 17   | c.1918dup           | p.Thr640Asnfs*9    | duplication  | truncation       | NP               | NP   |                      | 5                   | N                        | M            | CSRD    |
| 36 | 17   | c.1949T>A           | p.Leu650*          | substitution | truncation       | NP               | NP   |                      | 5                   | N                        | F            | CSRD    |
| 37 | 18   | c.2034delinsCA      | p.Ile679Asnfs*21   | indel        | truncation       | NP               | NP   |                      | 5                   | N                        | F            | CSRD    |
| 38 | 18   | c.2218G>T           | p.Glu740*          | substitution | truncation       | NP               | NP   |                      | 5                   | N                        | F            | CSRD    |
| 39 | 20   | c.2338_2343del      | p.Thr780_His781del | deletion     | in frame         | NP               | NP   |                      | 5                   | N                        | M            | CSRD    |

| ID | Exon | Nucleotide Change | Affected Protein         | Variant Type | Predicted Effect | Allele Frequency      |      | REVEL Score (0 to 1) | Pathogenicity Score | Familial (F)/De Novo (N) | Gender (M/F) | Domain        |
|----|------|-------------------|--------------------------|--------------|------------------|-----------------------|------|----------------------|---------------------|--------------------------|--------------|---------------|
|    |      |                   |                          |              |                  | ExAC                  | IGSR |                      |                     |                          |              |               |
| 40 | 20   | c.2349del         | p.Lys783Asnfs*8          | deletion     | truncation       | NP                    | NP   |                      | 5                   | N                        | M            | CSRD          |
| 41 | 20   | C.2392A>C         | p.Lys798Gln              | substitution | missense         | NP                    | NP   | 0.298                | 4                   | F                        | M            | CSRD          |
| 42 | 21   | c.2764G>A         | p.Gly922Ser              | substitution | missense         | NP                    | NP   | 0.861                | 3                   | N                        | M            | Outside       |
| 43 | 21   | c.2848del         | p.Gln950Argfs*4          | deletion     | truncation       | NP                    | NP   |                      | 5                   | N                        | F            | Outside       |
| 44 | 22   | c.2886_2897 del   | p.Glu962_Ala966delinsAsp | indel        | in frame         | NP                    | NP   |                      | 3                   | N                        | F            | Outside       |
| 45 | 23   | c.3027del         | p.Gln1010Lysfs*2         | deletion     | truncation       | NP                    | NP   |                      | 5                   | N                        | F            | Outside       |
| 46 | 23   | c.3040A>T         | p.Lys1014*               | substitution | truncation       | NP                    | NP   |                      | 5                   | N                        | M            | Outside       |
| 47 | 24   | c.3189T>A         | p.Cys1063*               | substitution | truncation       | NP                    | NP   |                      | 5                   | N                        | M            | Outside       |
| 48 | 26   | c.3429_3432dup    | p.Thr1145Leufs*51        | duplication  | truncation       | NP                    | NP   |                      | 5                   | N                        | F            | TBD           |
| 49 | 27   | c.3521A>G         | p.Gln1174Arg             | substitution | missense         | NP                    | NP   | 0.431                | 3                   | N                        | M            | TBD           |
| 50 | 27   | c.3578T>C         | p.Phe1193Ser             | substitution | missense         | NP                    | NP   | 0.691                | 3                   | N                        | M            | TBD           |
| 51 | 27   | c.3591dup         | p.Glu1198Argfs*6         | duplication  | truncation       | NP                    | NP   |                      | 5                   | N                        | F            | GRD-GTPase    |
| 52 | 27   | c.3632T>G         | p.Leu1211Arg             | substitution | missense         | NP                    | NP   | 0.914                | 3                   | N                        | F            | GRD-GTPase    |
| 53 | 27   | c.3651T>G         | p.Asp1217Glu             | substitution | missense         | NP                    | NP   | 0.606                | 3                   | F                        | F            | GRD-GTPase    |
| 54 | 27   | c.3665del         | p.Pro1222Leufs*2         | deletion     | truncation       | NP                    | NP   |                      | 5                   | N                        | M            | GRD-GTPase    |
| 55 | 27   | c.3692_3708del    | p.Val1231Glyfs*2         | deletion     | truncation       | NP                    | NP   |                      | 5                   | N                        | M            | GRD-GTPase    |
| 56 | 28   | c.3732dup         | p.Thr1245Tyrfs*4         | duplication  | truncation       | NP                    | NP   |                      | 5                   | N                        | M            | GRD-GTPase    |
| 57 | 28   | c.3834C>G         | p.Asn1278Lys             | substitution | missense         | NP                    | NP   | 0.579                | 3                   | N                        | M            | GRD-GTPase    |
| 58 | 30   | c.4000del         | p.Glu1334Lysfs*9         | deletion     | truncation       | NP                    | NP   |                      | 5                   | F                        | M            | GRD-GTPase    |
| 59 | 30   | c.4109A>C         | p.Gln1370Pro             | substitution | missense         | NP                    | NP   | 0.925                | 3                   | N                        | F            | GRD-GTPase-S1 |
| 60 | 30   | c.4110G>C         | p.Gln1370His             | substitution | missense         | NP                    | NP   | 0.771                | 3                   | N                        | F            | GRD-GTPase-S1 |
| 61 | 31   | c.4261del         | p.Met1421Cysfs*27        | deletion     | truncation       | NP                    | NP   |                      | 5                   | N                        | F            | GRD-GTPase-S1 |
| 62 | 31   | c.4269+1G>C       | p.?                      | substitution | splicing         | NP                    | NP   |                      | 4                   | N                        | M            | GRD-GTPase-S1 |
| 63 | 32   | c.4276C>T         | p.Gln1426*               | substitution | truncation       | NP                    | NP   |                      | 5                   | N                        | M            | GRD-GTPase-S1 |
| 64 | 32   | c.4309G>A         | p.Glu1437Lys             | substitution | missense         | NP                    | NP   | 0.845                | 3                   | N                        | M            | GRD-GTPase-S1 |
| 65 | 32   | c.4318_4319dup    | p.Met1440Ilefs*9         | duplication  | truncation       | NP                    | NP   |                      | 5                   | N                        | M            | GRD-GTPase-S1 |
| 66 | 32   | c.4319T>C         | p.Met1440Thr             | substitution | missense         | 1.24x10 <sup>-5</sup> | NP   | 0.952                | 3                   | F                        | M            | GRD-GTPase-S1 |
| 67 | 32   | c.4340T>G         | p.Val1447Gly             | substitution | missense         | NP                    | NP   | 0.863                | 3                   | N                        | F            | GRD-GTPase-S1 |
| 68 | 33   | c.4397del         | p.Pro1466Leufs*6         | deletion     | truncation       | NP                    | NP   |                      | 5                   | N                        | F            | GRD-GTPase-S1 |
| 69 | 33   | c.4435A>G         | p.Ser1479Gly             | substitution | missense         | NP                    | NP   | 0.467                | 3                   | N                        | M            | GRD-GTPase    |
| 70 | 33   | c.4457T>G         | p.Leu1486*               | substitution | truncation       | NP                    | NP   |                      | 5                   | N                        | M            | GRD-GTPase    |
| 71 | 33   | c.4469T>G         | p.Leu1490Arg             | substitution | missense         | NP                    | NP   | 0.934                | 3                   | N                        | F            | GRD-GTPase    |

| ID  | Exon | Nucleotide Change  | Affected Protein     | Variant Type | Predicted Effect | Allele Frequency |      | REVEL Score (0 to 1) | Pathogenicity Score | Familial (F)/De Novo (N) | Gender (M/F) | Domain          |
|-----|------|--------------------|----------------------|--------------|------------------|------------------|------|----------------------|---------------------|--------------------------|--------------|-----------------|
|     |      |                    |                      |              |                  | ExAC             | IGSR |                      |                     |                          |              |                 |
| 72  | 36   | c.4866G>T          | p.=                  | substitution | synonymous       | NP               | NP   |                      | 3                   | N                        | F            | SEC14-SEC14p    |
| 73  | 36   | c.4870del          | Thr1625Profs*52      | deletion     | truncation       | NP               | NP   |                      | 5                   | N                        | F            | SEC14-SEC14p    |
| 74  | 36   | c.4935dup          | p.Pro1646Serfs*15    | insertion    | truncation       | NP               | NP   |                      | 5                   | N                        | M            | SEC14-SEC14p    |
| 75  | 36   | c.4973_4978del     | p.Ile1658_Tyr1659del | deletion     | in frame         | NP               | NP   |                      | 5                   | N                        | F            | SEC14-SEC14p    |
| 76  | 37   | c.5206-1G>C        | p.?                  | substitution | splicing         | NP               | NP   |                      | 4                   | N                        | M            | SEC14-SEC14p-PH |
| 77  | 37   | c.5322T>A          | p.Asp1774Glu         | substitution | missense         | NP               | NP   | 0.651                | 3                   | N                        | M            | PH              |
| 78  | 37   | c.5413C>G          | p.His1805Asp         | substitution | missense         | NP               | NP   | 0.761                | 3                   | N                        | M            | PH              |
| 79  | 37   | c.5483_5490del     | p.Asp1828Glyfs*10    | deletion     | truncation       | NP               | NP   |                      | 5                   | N                        | M            | Outside         |
| 80  | 37   | c.5508delC         | p.Ile1836Metfs*6     | deletion     | truncation       | NP               | NP   |                      | 4                   | N                        | F            | Outside         |
| 81  | 37   | c.5508_5509delinsT | p.Ala1837Hisfs*5     | indel        | truncation       | NP               | NP   |                      | 5                   | N                        | M            | Outside         |
| 82  | 38   | c.5574del          | p.Leu1859*           | deletion     | truncation       | NP               | NP   |                      | 5                   | N                        | M            | Outside         |
| 83  | 38   | c.5609dup          | p.Leu1871Valfs*21    | duplication  | truncation       | NP               | NP   |                      | 5                   | N                        | F            | Outside         |
| 84  | 39   | c.5780dup          | p.Tyr1927*           | duplication  | truncation       | NP               | NP   |                      | 5                   | F                        | F            | Outside         |
| 85  | 41   | c.6134delC         | p.Thr2045Ilefs*4     | deletion     | truncation       | NP               | NP   |                      | 5                   | N                        | F            | Outside         |
| 86  | 41   | c.6148C>T          | p.Gln2050*           | substitution | truncation       | NP               | NP   |                      | 5                   | F                        | M            | Outside         |
| 87  | 41   | c.6263del          | p.Phe2088Serfs*2     | deletion     | truncation       | NP               | NP   |                      | 5                   | N                        | F            | Outside         |
| 88  | 41   | c.6361A>C          | p.Ser2121Arg         | substitution | missense         | NP               | NP   | 0.796                | 3                   | N                        | M            | Outside         |
| 89  | 42   | c.6365-2A>C        | p.?                  | substitution | splicing         | NP               | NP   |                      | 4                   | N                        | F            | Outside         |
| 90  | 42   | c.6389_6393delinsA | p.Leu2130Hisfs*2     | indel        | truncation       | NP               | NP   |                      | 5                   | N                        | F            | Outside         |
| 91  | 42   | c.6399dup          | p.Glu2134Argfs*14    | duplication  | truncation       | NP               | NP   |                      | 5                   | N                        | F            | Outside         |
| 92  | 42   | c.6482del          | p.Tyr2161Serfs*18    | deletion     | truncation       | NP               | NP   |                      | 5                   | N                        | F            | Outside         |
| 93  | 42   | c.6483_6487del     | p.Tyr2161*           | deletion     | truncation       | NP               | NP   |                      | 5                   | F                        | F            | Outside         |
| 94  | 42   | c.6537del          | p.Ser2180Profs*17    | deletion     | truncation       | NP               | NP   |                      | 4                   | N                        | M            | Outside         |
| 95  | 44   | c.6747del          | p.Ser2251Alafs*8     | deletion     | truncation       | NP               | NP   |                      | 4                   | N                        | F            | Outside         |
| 96  | 44   | c.6756G>T          | p.Lys2252Asn         | substitution | missense         | NP               | NP   | 0.229                | 3                   | N                        | F            | Outside         |
| 97  | 45   | c.6815del          | p.Ala2272Valfs*3     | deletion     | truncation       | NP               | NP   |                      | 5                   | N                        | F            | CTD             |
| 98  | 46   | c.6915T>C          | p.=                  | substitution | synonymous       | NP               | NP   |                      | 3                   | N                        | F            | CTD             |
| 99  | 46   | c.6967del          | p.Thr2323Leufs*2     | deletion     | truncation       | NP               | NP   |                      | 5                   | N                        | F            | CTD             |
| 100 | 46   | c.6999+2T>C        | p.?                  | substitution | splicing         | NP               | NP   |                      | 4                   | N                        | F            | CTD             |
| 101 | 47   | c.7118T>G          | p.Leu2373Arg         | substitution | missense         | NP               | NP   | 0.708                | 3                   | F                        | M            | CTD             |
| 102 | 47   | c.7126G>A          | p.Gly2376Arg         | substitution | missense         | NP               | NP   | 0.739                | 3                   | N                        | F            | CTD             |
| 103 | 48   | c.7197dup          | p.Asn2400*           | duplication  | truncation       | NP               | NP   |                      | 5                   | N                        | M            | CTD             |
| 104 | 48   | c.7224del          | p.Phe2408Leufs*3     | deletion     | truncation       | NP               | NP   |                      | 5                   | N                        | F            | CTD             |
| 105 | 49   | c.7274_7275del     | p.Ser2425*           | deletion     | truncation       | NP               | NP   |                      | 5                   | N                        | F            | CTD             |
| 106 | 49   | c.7320del          | p.Leu2441Phefs*27    | deletion     | truncation       | NP               | NP   |                      | 5                   | N                        | F            | CTD             |
| 107 | 52   | c.7719del          | p.Val2575Phefs*28    | deletion     | truncation       | NP               | NP   |                      | 5                   | N                        | M            | CTD             |
| 108 | 56   | c.8113G>A          | p.Asp2705Asn         | substitution | missense         | NP               | NP   | 0.148                | 3                   | N                        | M            | CTD-S2          |

**Legend:** CSRD:cysteine–serine-rich domain; TBD: tubulin-binding domain; GRD: GTPase-activating protein-related domain; SH1: syndecan binding domain 1; PH: pleckstrin homology domain; CTD: carboxy-terminal domain; SH2: syndecan binding domain 2; ExAC: The Exome Aggregation Consortium; IGS: International Genome Sample Resource and the 1000 genomes browser; NP: not provided. REVEL (Rare Exome Variant Ensemble Learner) score, the ensemble prediction tool used for the study, refers only to missense variants, with a deleterious score cutoff >0.5

**Table S2.** Clinical phenotype of the *NF1* mutations under study.

| ID | Exon | Nucleotide Change   | Affected Protein | Pathogenicity Score | Gender (M/F) | CALs | AIF | LN | CN SN | PN | OPG | Neoplasms | SD | CD | S  | H  |
|----|------|---------------------|------------------|---------------------|--------------|------|-----|----|-------|----|-----|-----------|----|----|----|----|
| 1  | 2    | Deletion exons 2–19 | p.?              | 5                   | M            | Y    | Y   | N  | N     | N  | Y   | N         | NA | NA | N  | N  |
| 2  | 5    | c.538_541del        | p.Leu180Serfs*10 | 5                   | M            | NA   | NA  | NA | NA    | NA | NA  | NA        | NA | NA | NA | NA |
| 3  | 5    | c.541_542del        | p.Gln181Valfs*19 | 4                   | M            | NA   | NA  | NA | NA    | NA | NA  | NA        | NA | NA | NA | NA |
| 4  | 5    | c.586+2T>C          | p.?              | 4                   | F            | NA   | NA  | NA | NA    | NA | NA  | NA        | NA | NA | NA | NA |
| 5  | 6    | c.603del            | p.Phe201Leufs*4  | 5                   | F            | Y    | Y   | N  | Y     | Y  | N   | N         | NA | N  | N  | N  |
| 6  | 6    | c.610dup            | p.Leu204Profs*12 | 5                   | M            | Y    | Y   | N  | Y     | N  | N   | N         | N  | N  | Y  | N  |
| 7  | 6    | c.615G>A            | p.=              | 3                   | F            | NA   | NA  | NA | NA    | NA | NA  | NA        | NA | NA | NA | NA |
| 8  | 8    | c.789del            | p.Ala264Glnfs*17 | 5                   | M            | NA   | NA  | NA | NA    | NA | NA  | NA        | NA | NA | NA | NA |
| 9  | 8    | c.792del            | p.Ala265Glnfs*16 | 5                   | M            | NA   | NA  | NA | NA    | NA | NA  | NA        | NA | NA | NA | NA |
| 10 | 8    | c.862del            | p.Val288Trpfs*7  | 4                   | M            | Y    | Y   | N  | N     | N  | N   | N         | N  | N  | N  | N  |
| 11 | 8    | c.886A>T            | p.Lys296*        | 4                   | M            | Y    | Y   | N  | N     | N  | N   | N         | N  | N  | N  | N  |
| 12 | 8    | c.888+1G>C          | p.?              | 4                   | F            | Y    | Y   | NA | Y     | N  | N   | N         | Y  | N  | N  | N  |
| 13 | 9    | c.1041_1045del      | p.Gln347Hisfs*4  | 5                   | F            | Y    | N   | Y  | Y     | N  | N   | N         | N  | N  | Y  | N  |
| 14 | 9    | c.1061A>G           | p.Lys354Arg      | 3                   | M            | NA   | NA  | NA | NA    | NA | NA  | NA        | NA | NA | NA | NA |
| 15 | 10   | c.1144del           | p.Ser382Leufs*5  | 4                   | M            | Y    | Y   | N  | N     | N  | Y   | N         | N  | N  | N  | N  |
| 16 | 12   | c.1280_1292del      | p.Pro427Leufs*42 | 5                   | F            | NA   | NA  | NA | NA    | NA | NA  | NA        | NA | NA | NA | NA |
| 17 | 12   | c.1324_1325del      | p.Met442Valfs*3  | 5                   | M            | Y    | Y   | Y  | N     | N  | N   | N         | Y  | N  | N  | N  |
| 18 | 12   | c.1374dup           | p.Ala459Serfs*11 | 5                   | M            | Y    | Y   | N  | N     | N  | N   | N         | Y  | N  | N  | Y  |
| 19 | 12   | c.1392del           | p.Ser465Valfs*8  | 5                   | F            | Y    | Y   | Y  | Y     | N  | N   | N         | N  | Y  | Y  | N  |
| 20 | 13   | c.1400del           | p.Thr467Asnfs*6  | 5                   | M            | NA   | NA  | NA | NA    | NA | NA  | NA        | NA | NA | NA | NA |
| 21 | 13   | c.1460G>A           | p.Arg487Lys      | 3                   | M            | NA   | NA  | NA | NA    | NA | NA  | NA        | NA | NA | NA | NA |
| 22 | 13   | c.1462del           | p.Ser488Alafs*10 | 5                   | M            | Y    | N   | N  | Y     | N  | Y   | N         | N  | Y  | N  | Y  |
| 23 | 13   | c.1469_1472del      | p.Lys490Ilefs*7  | 5                   | F            | Y    | Y   | Y  | N     | N  | N   | N         | N  | Y  | Y  | N  |
| 24 | 13   | c.1477C>G           | p.Leu493Val      | 3                   | M            | NA   | NA  | NA | NA    | NA | NA  | NA        | NA | NA | NA | NA |
| 25 | 13   | c.1525dup           | p.Cys509Leufs*2  | 5                   | F            | Y    | Y   | N  | N     | N  | N   | N         | N  | N  | N  | N  |
| 26 | 14   | c.1561del           | p.Ser521Valfs*5  | 5                   | M            | Y    | Y   | NA | Y     | Y  | N   | N         | N  | N  | N  | N  |
| 27 | 14   | c.1585C>T           | p.Leu529Phe      | 3                   | F            | Y    | Y   | N  | Y     | N  | N   | N         | N  | Y  | Y  | N  |
| 28 | 14   | c.1613delT          | Met538Serfs*18   | 5                   | M            | NA   | NA  | NA | NA    | NA | NA  | NA        | NA | NA | NA | NA |
| 29 | 14   | c.1641+2delT        | p.?              | 4                   | F            | Y    | N   | N  | N     | N  | N   | N         | NA | N  | N  | N  |
| 30 | 15   | c.1683G>A           | p.Trp561*        | 5                   | F            | NA   | NA  | NA | NA    | NA | NA  | NA        | NA | NA | NA | NA |
| 31 | 15   | c.1714_1721+5del    | p.?              | 4                   | M            | NA   | NA  | NA | NA    | NA | NA  | NA        | NA | NA | NA | NA |
| 32 | 17   | c.1866T>A           | p.Cys622*        | 5                   | M            | NA   | NA  | NA | NA    | NA | NA  | NA        | NA | NA | NA | NA |
| 33 | 17   | c.1883_1885delinsCC | p.Tyr628Serfs*3  | 5                   | F            | Y    | Y   | N  | Y     | N  | N   | N         | N  | N  | N  | N  |
| 34 | 17   | c.1889T>A           | p.Val630Glu      | 3                   | M            | Y    | Y   | N  | N     | N  | Y   | N         | N  | N  | N  | N  |
| 35 | 17   | c.1918dup           | p.Thr640Asnfs*9  | 5                   | M            | Y    | Y   | N  | N     | N  | N   | N         | NA | Y  | N  | N  |



| ID  | Exon | Nucleotide Change  | Affected Protein  | Pathogenicity Score | Gender (M/F) | CALs | AIF | LN | CN/SN | PN | OPG | Neoplasms | SD | CD | S  | H  |
|-----|------|--------------------|-------------------|---------------------|--------------|------|-----|----|-------|----|-----|-----------|----|----|----|----|
| 79  | 37   | c.5483_5490del     | p.Asp1828Glyfs*10 | 5                   | M            | Y    | Y   | N  | Y     | N  | N   | N         | N  | N  | N  | N  |
| 80  | 37   | c.5508delC         | p.Ile1836Metfs*6  | 4                   | F            | Y    | Y   | Y  | Y     | N  | N   | N         | N  | N  | N  | N  |
| 81  | 37   | c.5508_5509delinsT | p.Ala1837Hisfs*5  | 5                   | M            | NA   | NA  | NA | NA    | NA | NA  | NA        | NA | NA | NA | NA |
| 82  | 38   | c.5574del          | p.Leu1859*        | 5                   | M            | NA   | NA  | NA | NA    | NA | NA  | NA        | NA | NA | NA | NA |
| 83  | 38   | c.5609dup          | p.Leu1871Valfs*21 | 5                   | F            | NA   | NA  | NA | NA    | NA | NA  | NA        | NA | NA | NA | NA |
| 84  | 39   | c.5780dup          | p.Tyr1927*        | 5                   | F            | Y    | Y   | N  | Y     | N  | N   | N         | N  | N  | N  | Y  |
| 85  | 41   | c.6134delC         | p.Thr2045Ilefs*4  | 5                   | F            | Y    | Y   | N  | N     | N  | Y   | N         | N  | N  | N  | N  |
| 86  | 41   | c.6148C>T          | p.Gln2050*        | 5                   | M            | NA   | NA  | NA | NA    | NA | NA  | NA        | NA | NA | NA | NA |
| 87  | 41   | c.6263del          | p.Phe2088Serfs*2  | 5                   | F            | NA   | NA  | NA | NA    | NA | NA  | NA        | NA | NA | NA | NA |
| 88  | 41   | c.6361A>C          | p.Ser2121Arg      | 3                   | M            | Y    | N   | Y  | N     | N  | N   | N         | N  | Y  | Y  | N  |
| 89  | 42   | c.6365-2A>C        | p.?               | 4                   | F            | Y    | Y   | N  | Y     | N  | N   | N         | N  | N  | Y  | N  |
| 90  | 42   | c.6389_6393delinsA | p.Leu2130Hisfs*2  | 5                   | F            | Y    | N   | Y  | Y     | Y  | Y   | N         | N  | N  | Y  | Y  |
| 91  | 42   | c.6399dup          | p.Glu2134Argfs*14 | 5                   | F            | NA   | NA  | NA | NA    | NA | NA  | NA        | NA | NA | NA | NA |
| 92  | 42   | c.6482del          | p.Tyr2161Serfs*18 | 5                   | F            | N    | N   | Y  | Y     | N  | N   | N         | N  | N  | N  | N  |
| 93  | 42   | c.6483_6487del     | p.Tyr2161*        | 5                   | F            | NA   | NA  | NA | NA    | NA | NA  | NA        | NA | NA | NA | NA |
| 94  | 42   | c.6537del          | p.Ser2180Profs*17 | 4                   | M            | Y    | Y   | Y  | Y     | N  | N   | N         | N  | N  | N  | N  |
| 95  | 44   | c.6747del          | p.Ser2251Alafs*8  | 4                   | F            | Y    | N   | NA | N     | N  | N   | N         | N  | N  | N  | N  |
| 96  | 44   | c.6756G>T          | p.Lys2252Asn      | 3                   | F            | NA   | NA  | NA | NA    | NA | NA  | NA        | NA | NA | NA | NA |
| 97  | 45   | c.6815del          | p.Ala2272Valfs*3  | 5                   | F            | Y    | N   | N  | N     | N  | N   | N         | N  | N  | N  | N  |
| 98  | 46   | c.6915T>C          | p.=               | 3                   | F            | NA   | NA  | NA | NA    | NA | NA  | NA        | NA | NA | NA | NA |
| 99  | 46   | c.6967del          | p.Thr2323Leufs*2  | 5                   | F            | Y    | N   | N  | Y     | N  | N   | N         | N  | N  | Y  | N  |
| 100 | 46   | c.6999+2T>C        | p.?               | 4                   | F            | Y    | N   | Y  | Y     | N  | N   | N         | N  | N  | N  | N  |
| 101 | 47   | c.7118T>G          | p.Leu2373Arg      | 3                   | M            | Y    | Y   | N  | Y     | N  | N   | N         | N  | N  | N  | N  |
| 102 | 47   | c.7126G>A          | p.Gly2376Arg      | 3                   | F            | Y    | N   | Y  | Y     | N  | N   | N         | N  | N  | N  | N  |
| 103 | 48   | c.7197dup          | p.Asn2400*        | 5                   | M            | NA   | NA  | NA | NA    | NA | NA  | NA        | NA | NA | NA | NA |
| 104 | 48   | c.7224del          | p.Phe2408Leufs*3  | 5                   | F            | Y    | Y   | N  | Y     | Y  | N   | N         | Y  | N  | Y  | N  |
| 105 | 49   | c.7274_7275del     | p.Ser2425*        | 5                   | F            | Y    | N   | N  | N     | N  | N   | N         | N  | N  | N  | N  |
| 106 | 49   | c.7320del          | p.Leu2441Phefs*27 | 5                   | F            | NA   | NA  | NA | NA    | NA | NA  | NA        | NA | NA | NA | NA |
| 107 | 52   | c.7719del          | p.Val2575Phefs*28 | 5                   | M            | Y    | Y   | N  | N     | N  | N   | N         | N  | N  | N  | N  |
| 108 | 56   | c.8113G>A          | p.Asp2705Asn      | 3                   | M            | Y    | N   | N  | N     | N  | N   | N         | N  | N  | N  | N  |

**Legend:** CALs: cafe au lait patches; AIF: axillary or groin freckling; LN: Lisch nodules; CN/SN: cutaneous/subcutaneous; PN: plexiform neurofibromas; OPG: optic pathway glioma; SD: sphenoid wing dysplasia; S: scoliosis; H: hypertension; CD: cognitive deficit; Y: yes; N: no; NA: not available.
